# Supplementary material for: Real-World Safety and Outcome of First-Line Pembrolizumab Monotherapy for Metastatic NSCLC with PDL-1 Expression ≥ 50%: A National Italian Multicentric Cohort (“PEMBROREAL” Study)
Source: MDPI journal article supplement (doi:10.3390/cancers16101802), 2024-05-08

**Supplementary Table S1:** Reasons for Pembrolizumab Treatment discontinuation

| Reason                                              | Overall Patients<br>n (%) |
|-----------------------------------------------------|---------------------------|
| Progressive disease or clinical progressive disease | 474 (53.9)                |
| Unacceptable toxicity                               | 55 (6.3)                  |
| Lost to follow up                                   | 39 (4.4)                  |
| Patient's decision                                  | 4 (0.5)                   |
| Clinical decision                                   | 46 (5.2)                  |
| Death                                               | 120 (13.6)                |
| Not specified                                       | 1 (0.1)                   |
| Therapy is still ongoing at the cutoff data         | 141 (16.0)                |

**Supplementary Table S2:** Response Rate

| Best overall response | Overall patients<br>n (%) |
|-----------------------|---------------------------|
| Complete response     | 24 (2.7)                  |
| Partial response      | 155 (17.6)                |
| Stable disease        | 204 (23.2)                |
| Progressive disease   | 228 (25.9)                |
| Not yet documented    | 269 (30.6)                |

**Supplementary Table S3:** Adverse reaction management

| Action taken                                             | Overall patients<br>n (%) |
|----------------------------------------------------------|---------------------------|
| Suspension of one or more drug                           | 71 (8.07)                 |
| Permanent discontinuation of the treatment               | 47 (5.3)                  |
| Dose reduction of one or more drugs                      | 0 (0.0)                   |
| Specific pharmacologic treatment for toxicity management | 177 (20.1)                |
| Hospitalization or prolongation of hospitalization       | 55 (6.25)                 |

**Supplementary Table S4:** univariables and multivariable model for Rw-PFS

| Variables                         | Univariable models |         |           | Multivariable model |         |           |
|-----------------------------------|--------------------|---------|-----------|---------------------|---------|-----------|
|                                   | Hazard Ratio       | p-value | 95% CI    | Hazard Ratio        | p-value | 95% CI    |
| Smoker/Former smoker vs no smoker | 0.72               | 0.007   | 0.57-0.92 | 0.81                | 0.144   | 0.61-1.07 |
| PDL1 70-89% vs PDL1 50-69%        | 0.90               | 0.368   | 0.73-1.11 | 0.82                | 0.125   | 0.64-1.05 |
| PDL1 ≥90% vs PDL1 50-69%          | 0.64               | 0.001   | 0.49-0.83 | 0.62                | 0.001   | 0.46-0.83 |
| PS ECOG 1 vs PS ECOG 0            | 1.36               | <0.001  | 1.15-1.60 | 1.51                | <0.001  | 1.20-1.89 |
| PS ECOG 2 vs PS ECOG 0            | 2.56               | <0.001  | 1.94-3.38 | 2.36                | <0.001  | 1.50-3.69 |

**Supplementary Table S5:** univariables and multivariable model for Rw-OS

| Variable by subgroup of therapy                | Univariable models |         |           | Multivariable model |         |           |
|------------------------------------------------|--------------------|---------|-----------|---------------------|---------|-----------|
|                                                | HR                 | p-value | 95% CI    | HR                  | p-value | 95% CI    |
| Age ≥75 years vs age <75                       | 1.36               | 0.002   | 1.12-1.67 | 1.27                | 0.063   | 0.99-1.64 |
| Female vs Male                                 | 0.77               | 0.015   | 0.62-0.95 | 0.83                | 0.188   | 0.64-1.09 |
| No squamo vs squamo (main effect)              | 0.75               | 0.011   | 0.60-0.94 | 1.10                | 0.709   | 0.66-1.84 |
| No squamo vs squamo (time dependent effect)    | -                  | -       | -         | 0.79                | 0.051   | 0.64-1.01 |
| PS ECOG 1 vs PS ECOG 0 (main effect)           | 1.43               | <0.001  | 1.18-1.74 | 3.09                | <0.001  | 1.86-5.16 |
| PS ECOG 2 vs PS ECOG 0 (main effect)           | 2.49               | <0.001  | 1.82-3.40 | 5.89                | <0.001  | 3.11-11.1 |
| PS ECOG 1 vs PS ECOG 0 (time dependent effect) | -                  | -       | -         | 0.67                | <0.001  | 0.54-0.84 |
| PS ECOG 2 vs PS ECOG 0 (time dependent effect) | -                  | -       | -         | 0.53                | <0.001  | 0.39-0.72 |
| Smoker+ex smoker vs no smoker                  | 1.37               | 0.045   | 1.01-1.87 | 1.32                | 0.077   | 0.97-1.82 |

**Supplementary Figure S1:** Kaplan – Meier curves for Rw-PFS in subgroup of interest. A) PD-L1 levels (50-69%; 70-89%;  $\geq 90\%$ ) B) ECOG PS C) smoking status

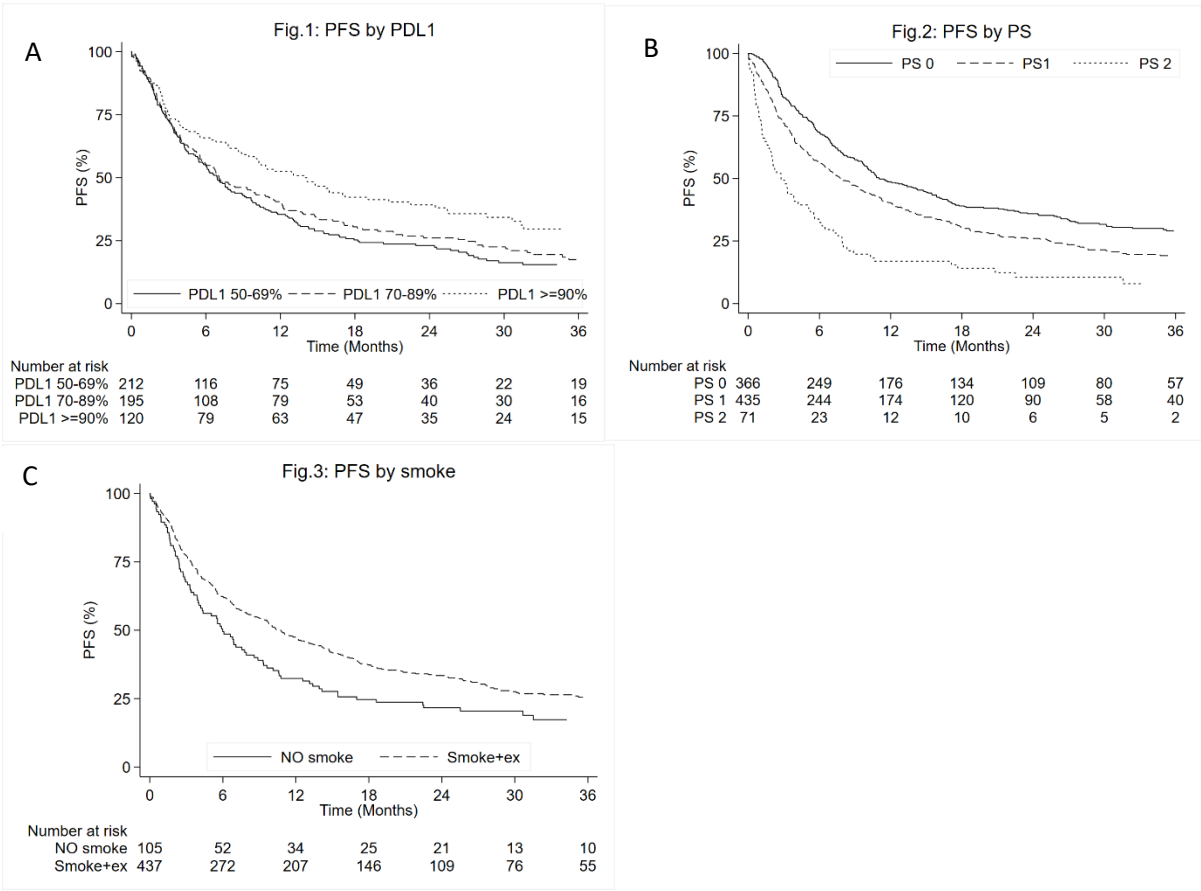

**Supplementary Figure S2:** Kaplan – Meier curves of real world OS in subgroup of interest. A) age (<75 years vs ≥ 75 years) . B) Gender C) histological type D) smoking status E) ECOG PS

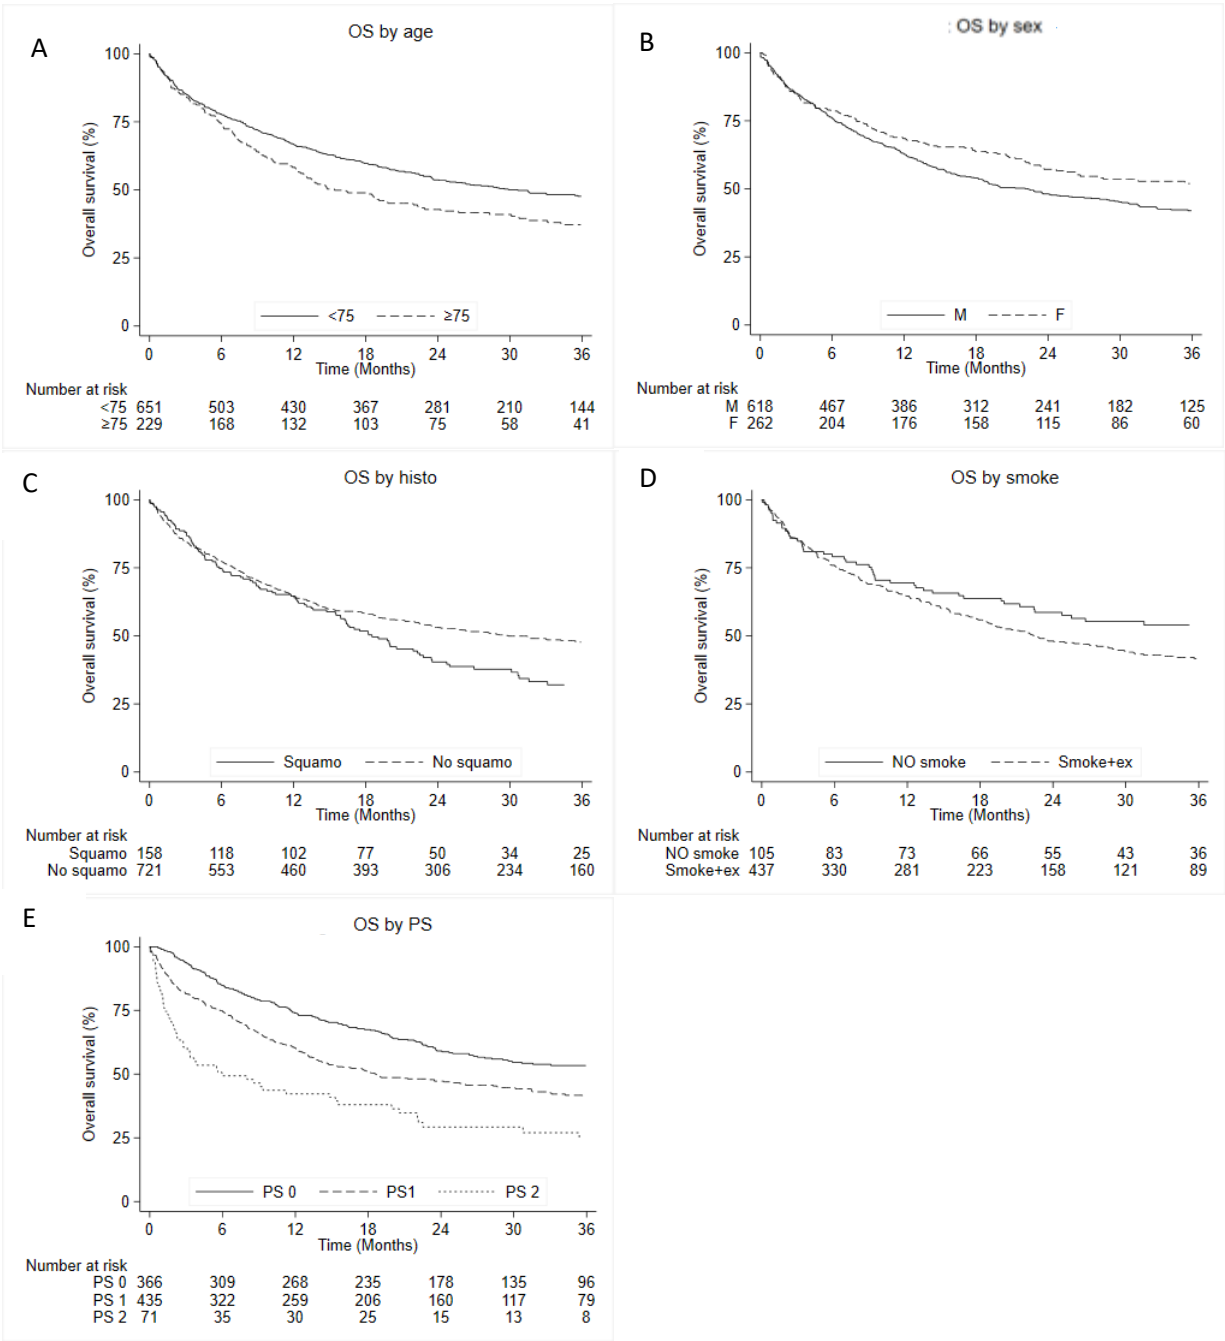

Supplement: s1 [file s1]
